# Supplementary material
Source: HighWire-hosted journal article supplement (https://www.jneurosci.org/highwire/filestream/600268/field_highwire_adjunct_files/1/Figure_S2.pdf)

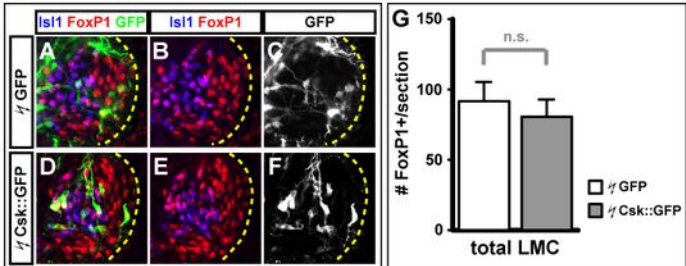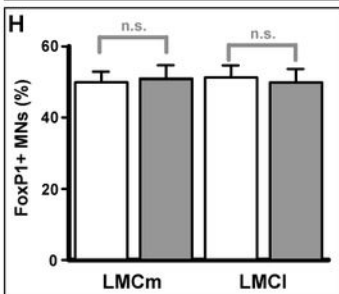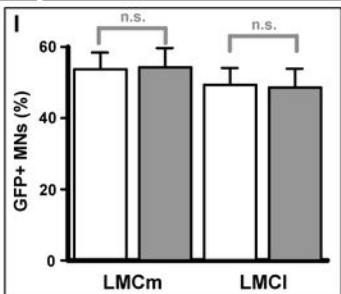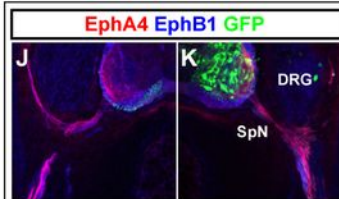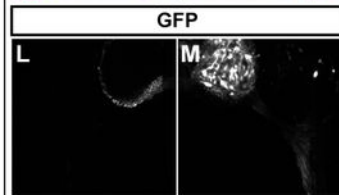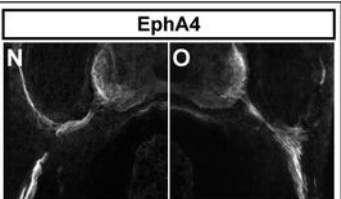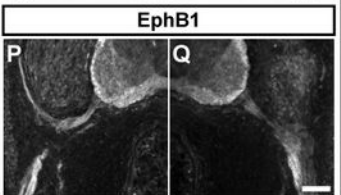

Supplement: Figure_S2.pdf [file Figure_S2.pdf]
